# Supplementary material
Source: PubMed Central journal article supplement (PMC3093898)
Supplement: supp_M110.210542_SupplementalFigureJBC.pdf [file supp_M110.210542_SupplementalFigureJBC.pdf]

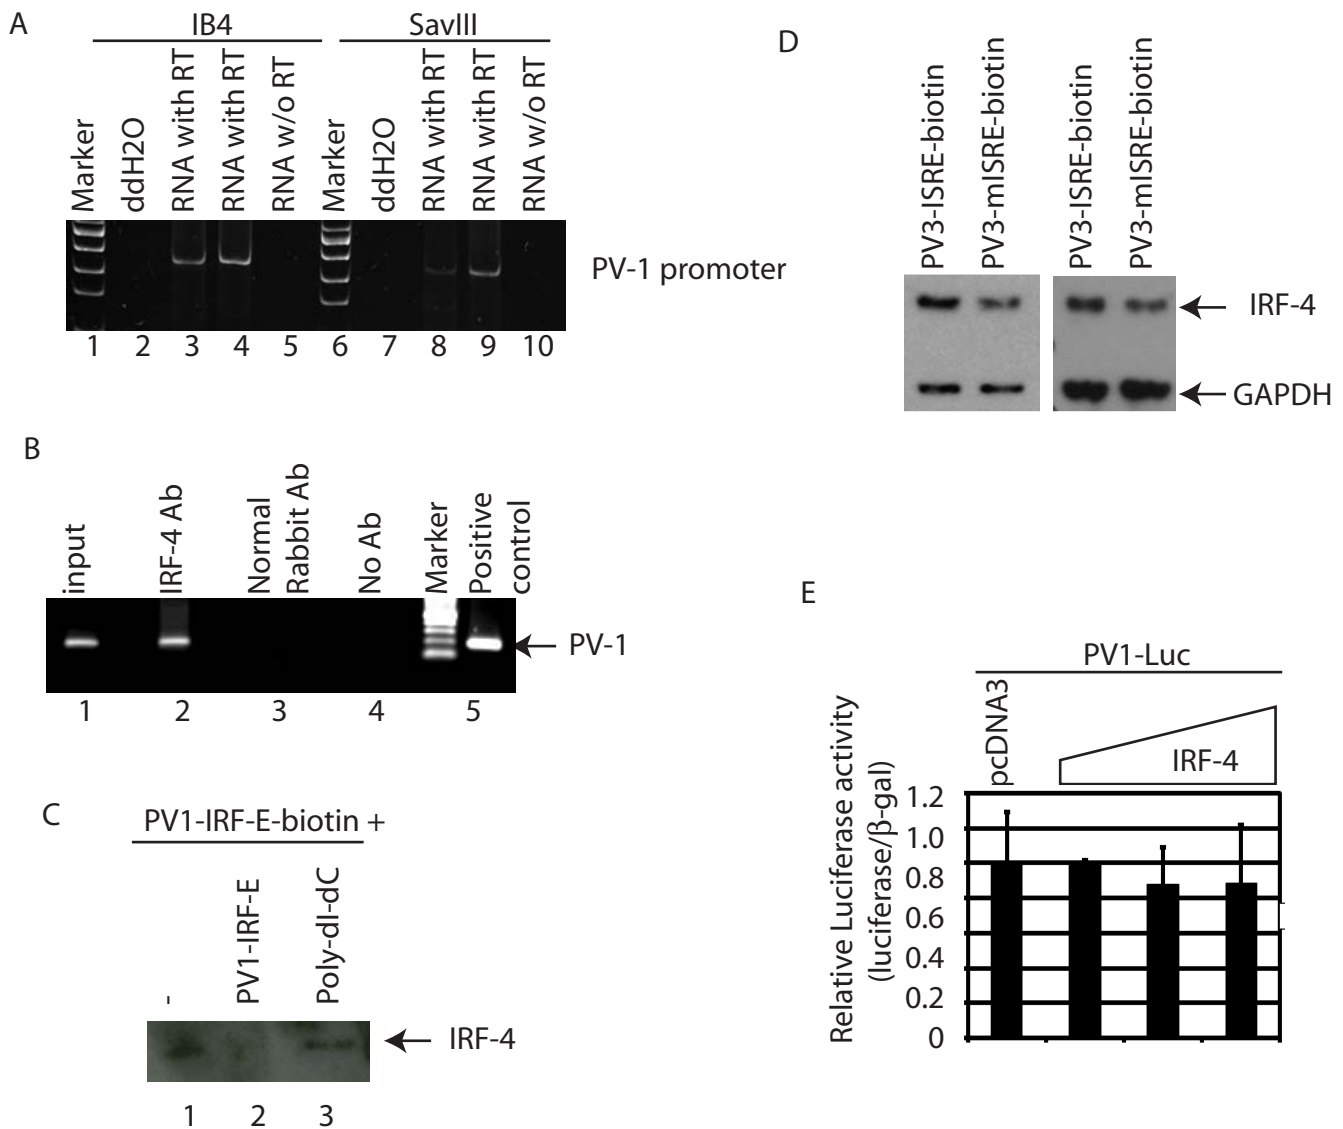

**Supplemental Figure 1: IRF-4 binds to IRF-5 PV1 promoter region.** A) The PV1 promoter is active in EBV transformed cells. The RNAs were isolated from the EBV transformed cells as shown on the top, and RT-PCR was used to determine the transcriptional activities with the target promoter-specific primers. The specificity of the amplification is indicated. B) IRF-4 binds to IRF-5 PV1 promoter in vivo. IRF-4 antibody was used for ChIP analyses to detect in vivo DNA binding activities to IRF-5 promoter region. Primers for IRF-5 PV-1 promoter regions were used to amplify the DNA from immunoprecipitates. The identity of PV1-promoter amplification is as shown. The plasmid, IRF-5 PV1-luc, was used as positive control. Input DNA represents the PCR amplification from 1/100 the amount of input lysates for immunoprecipitations. PCR amplification of immunoprecipitates from normal rabbit serum (NRS) is also shown as controls. C) IRF-4 binds to PV-1 promoter in vitro. Cell extracts were made and from IB4 cells and incubated with biotinylated oligonucleotides containing the IRF-5 PV1 IRF-E sequences with or without the un-biotinylated IRF-5 PV1 IRF-E, or poly(dI-dC) as competitors. Western blots were carried out for the detection of IRF-4. D). IRF-4 binds to IRF-5 mutated ISRE weakly in vitro. Cell extracts were made and from IB4 cells and incubated with biotinylated oligonucleotides containing the IRF-5 PV-3 ISRE sequences or its mutated counterparts. Western blots were carried out for the detection of IRF-4 and GAPDH. E). IRF-4 did not repress IRF-5 PV-1 promoter activity. 293T cells were transfected with various reporter constructs and expression plasmid (0.01, 0.05, and 0.1  $\mu$ g) as shown on the top. Cell lysates were used for the luciferase and  $\beta$ -galactosidase assays. Relative promoter reporter activities (luciferase/ $\beta$ -galactosidase) are shown. Standard error bars are shown.

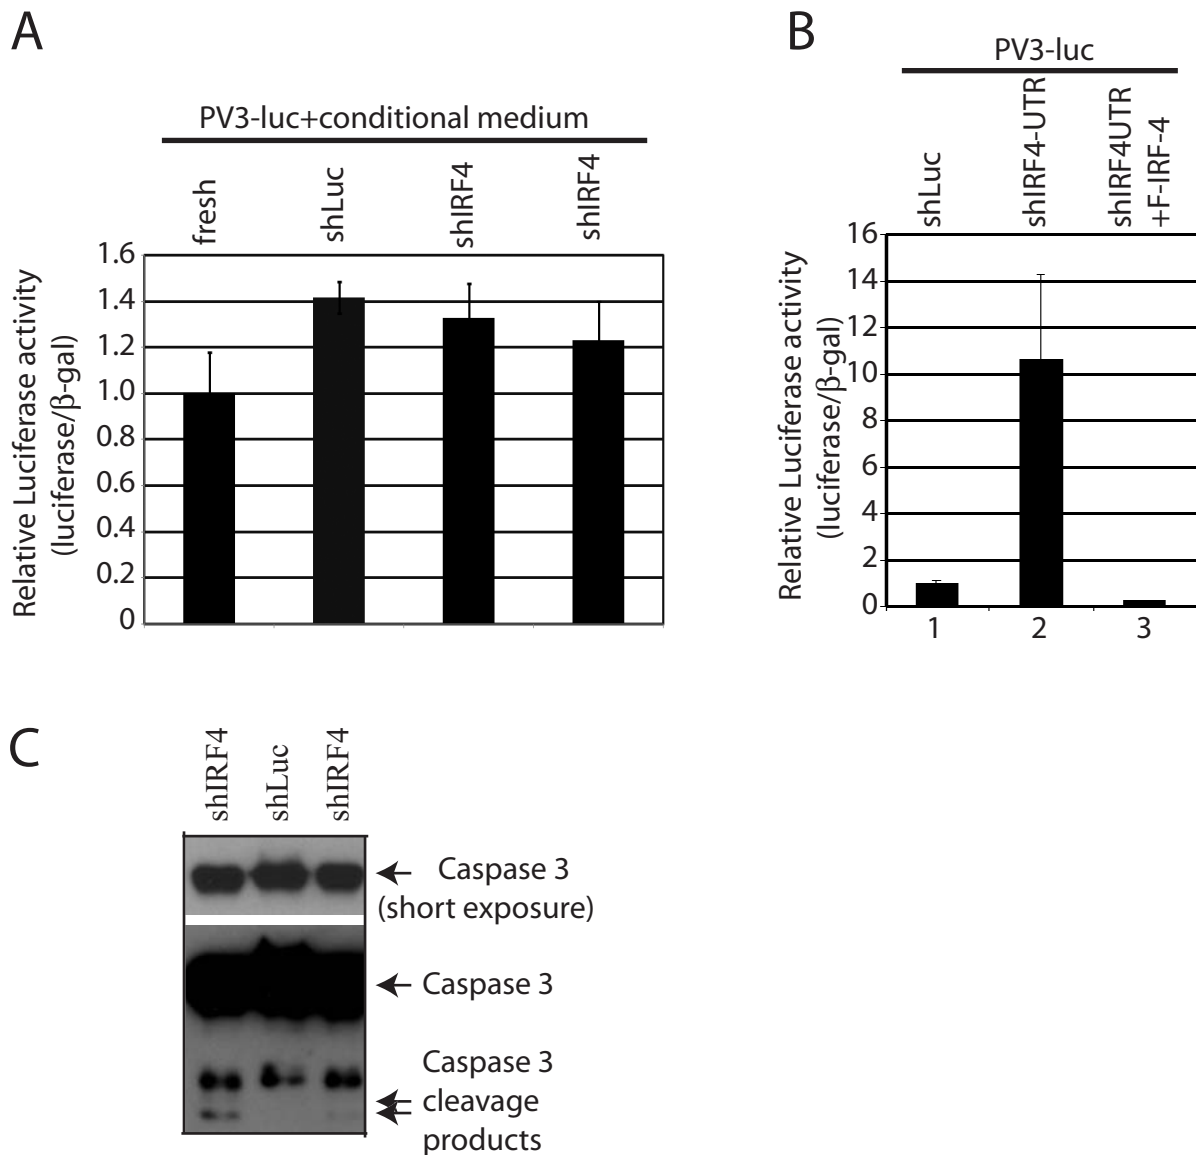

## Supplemental Figure 2:

**A. Conditional medium from shIRF-4-transfected cells did not activate PV-3 promoter reporter construct.** IB4 cells were transfected with shLuc or shIRF4. The medium was collected and passed through a 0.2 mm filter. The conditional medium was used for the treatment. 293T cells were transfected with PV-3 reporter construct for one day. The conditional medium was added (1:1 ratio) as shown on the top. Cell lysates were used for the luciferase and  $\beta$ -galactosidase assays one day later. shIRF4 was duplicated.

**B. Endogenous IRF-4 regulates IRF-5 promoter activity in P2 cells.** P2 are STAT-1-null EBV-transformed B lymphocyte line. P2 cells were transfected with indicated plasmid as shown on the top. Two days later, luciferase and  $\beta$ -galactosidase activities were measured. Relative promoter reporter activities are shown.

**C. Caspase 3 cleavage in IRF-4-knockdown cells.** IB4 cells were transfected with shLuc or shIRF4. Two days later, lysates from transfected cells were used for western blot analysis with caspase 3 antibody. shIRF4 was duplicated. The identity of proteins is as shown.

A

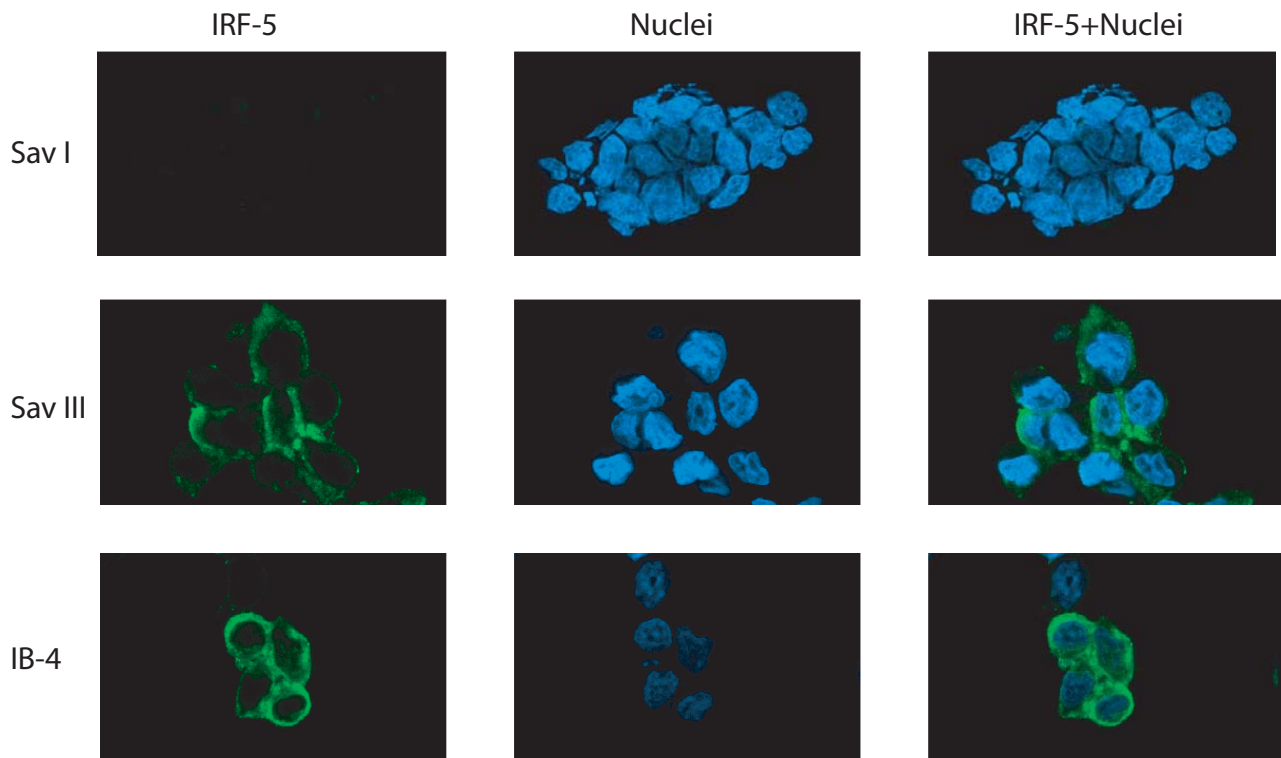

B

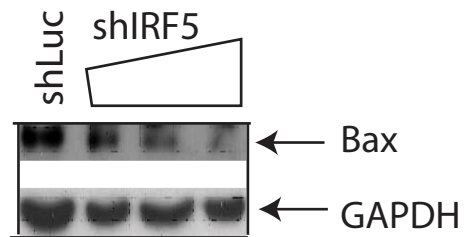

**Supplemental Figure 3. A. Subcellular localization of IRF-5.** Cells were stained with anti-IRF-5 and AlexaFluor 488-labeled secondary antibodies were used to determine the subcellular localization of IRF-5 (green). DAPI was used to stain the nuclei (blue). Sav I and Sav III are genetically identical cell lines with different EBV latencies. It is known that IRF-5 is expressed at high levels in type III latency. IB-4 is a type III latency cells.

**B. Reduction of IRF-5 reduces the expression of Bax.** IB4 cells were transfected with shLuc or shIRF5 . Two days after transfection, cells were collected and western blot was used to examine the expression .

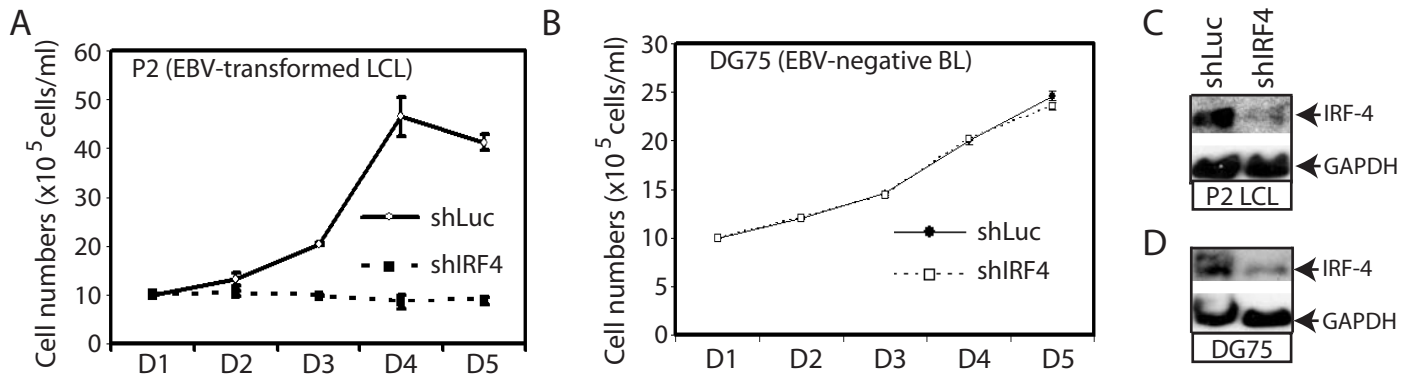

**Supplemental Figure 4. Knockdown of IRF-4 inhibits cell growth of EBV-transformed cells.**

A) Knockdown of IRF-4 inhibits cell growth of P2 cells. P2 is an EBV-transformed cell line. P2 cells were transfected with shLuc (5  $\mu$ g), shIRF4 (5  $\mu$ g) along with CD4 expression plasmid (1 $\mu$ g). One day after the transfection, CD4 expression cells were enriched with a magnetic beads containing CD4 antibody (In vitrogen). At the indicated days after transfection, surviving cells were enumerated. Each point represents the number of live cells (mean  $\pm$  S.D.). One representative from three independent experiments is shown. B. Knockdown of IRF-4 does not inhibit cell growth of DG75 cells. DG75 is an EBV-negative BL cell line. Similar methods were used as in P2 cells. The expression of IRF-4 in P2 cells (C), or in DG75 cells (D) are shown. The images in the same box are derived from the same membrane.
